# Supplementary material for: Simulated Microgravity Suppresses Osteogenic Differentiation of Mesenchymal Stem Cells by Inhibiting Oxidative Phosphorylation
Source: MDPI journal article supplement (doi:10.3390/ijms21249747), 2020-12-21
Supplement: s1 [file s1]

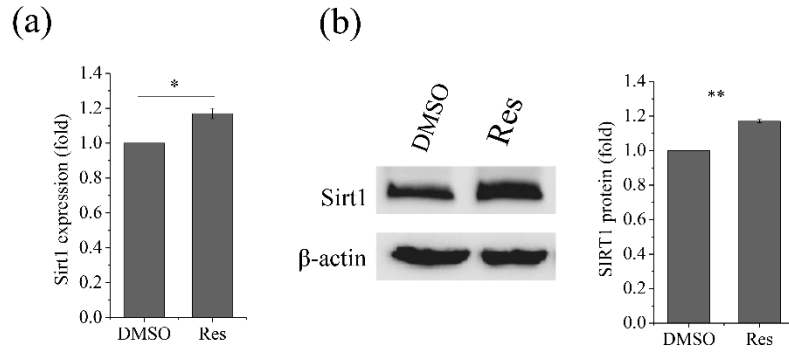

**Figure S1.** The expression of Sirt1 is upregulated after treatment with resveratrol under normal gravity conditions. (a) Gene expression of Sirt1 after treatment with resveratrol; (b) Protein levels of Sirt1 after treatment with resveratrol. For each group, the values are the mean  $\pm$  SEM from three representative independent experiments. Control: solvent control (DMSO). \* $p < 0.05$ . Res, resveratrol.

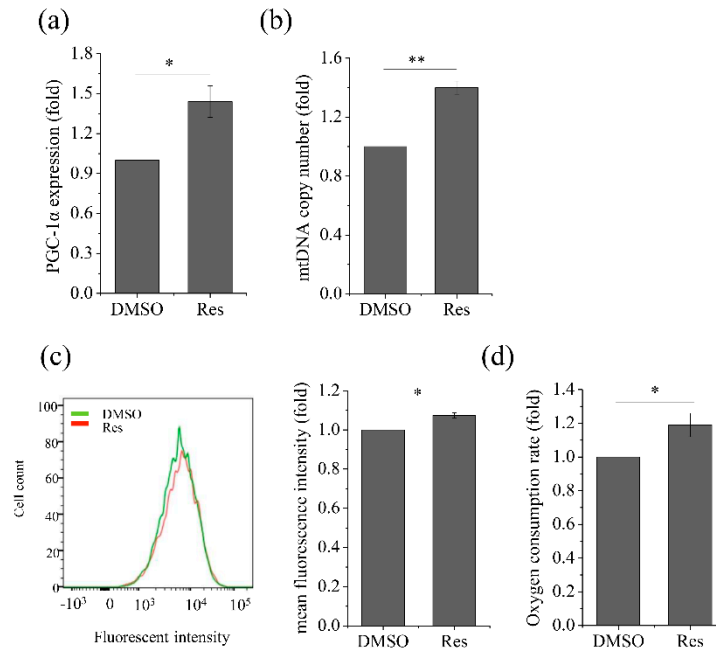

**Figure S2.** Upregulation of Sirt1 recovers OXPHOS of MSCs for 72h with resveratrol treatment under normal gravity conditions. (a) Gene expression of PGC-1 $\alpha$ . (b) Relative mtDNA copy number levels. (c) Cells were stained with MitoTracker Green for mitochondrial mass and assessed by flow cytometry. (d) Relative OCR levels. The values are the mean  $\pm$  SEM from three representative independent experiments. Control: solvent control (DMSO). \* $p < 0.05$ . Res, resveratrol.
